# Supplementary material for: Trade in Zambian Edible Orchids &ndash; DNA Barcoding Reveals Use of Unexpected Orchid Taxa for <em>Chikanda</em>
Source: Preprints.org preprint supplement (doi:10.20944/preprints201810.0587.v1), 2018-10-25
Supplement: Supplementary file 1 [file supplementary]

## Sheet: ST2
category	family	genus	sp1	author1	rank1	sp2	author2	detby	detdd	detmm	detyy	detstatus	collector	addcoll	prefix	number	suffix	colldd	collmm	collyy	country	majorarea	minorarea	gazetteer	lat	ns	long	ew	llunit	llorig	lldatum	llres	alt	altmax	altunit	frequency	flcode	frcode	vernacular	language	uses	cultivated	automatch	importid	rde_error	rde_errtxt	rde_info	brahmslink	treetaxa
Herbarium Sheet	Orchidaceae	Brachycorythis	ovata	Lindl.	subsp.	welwitschii	(Rchb.f.) Summerh.	Bytebier, B.	13	11	2017	checked	Bone, R.E.	Wightman, N.; Mpatwa, G.; Yokoya, K.	RB	404		20	1	2017	Zambia	North-Western	Mwinilunga	Lumwana	11.4845	S	25.0516	E	DMS		WGS84		1492		m		n	Y				FALSE		5			MAJOR/ GAZ/ New collector/ New addcoll/ New addcoll/ New addcoll/	0	Brachycorythis ovata subsp. welwitschii
Herbarium Sheet	Orchidaceae	Brachycorythis	buchananii	(Schltr.) Rolfe				Bytebier, B.	13	11	2017	checked	Bone, R.E.	Wightman, N.; Mpatwa, G.; Yokoya, K.	RB	409		21	1	2017	Zambia	North-Western	Solwezi	Kangwena	12.2219	S	27.1822	E	DMS		WGS84		1313		m		Y	n	Michila michila			FALSE		10			MAJOR/ GAZ/ New collector/ New addcoll/ New addcoll/ New addcoll/	0	Brachycorythis buchananii
Herbarium sheet	Orchidaceae	Brachycorythis	pubescens	Harv.					0	0	0		Bytebier, B.	Wightman, N.; Llarena, F.		3553		6	2	2018	Zambia	Northern	Kasama	Luchindasi	10.2101	S	31.3166	E	DM		WGS84		1243									FALSE		0				0	Brachycorythis pubescens
Herbarium sheet	Orchidaceae	Brachycorythis							0	0	0		Bytebier, B.	Wightman, N.; Llarena, F.		3554		6	2	2018	Zambia	Northern	Kasama	Luchindasi	10.2101	S	31.3166	E	DM		WGS84		1243									FALSE		0				0	Brachycorythis
Herbarium sheet	Orchidaceae	Brachycorythis	pubescens	Harv.					0	0	0		Bytebier, B.	Wightman, N.; Llarena, F.		3559		7	2	2018	Zambia	Northern	Kasama	Ilunda Dambo	10.0642	S	31.0996	E	DM		WGS84		1325									FALSE		0				0	Brachycorythis pubescens
Herbarium sheet	Orchidaceae	Brachycorythis	angolensis	(Schltr.) Schltr.					0	0	0		Bytebier, B.	Wightman, N.; Llarena, F.		3598		11	2	2018	Zambia	Luapula		Bangweulu Wetlands	12.0198	S	29.3751	E	DM		WGS84		1171									FALSE		0				0	Brachycorythis angolensis
Herbarium sheet	Orchidaceae	Brachycorythis	buchananii	(Schltr.) Rolfe					0	0	0		Bytebier, B.	Wightman, N.; Llarena, F.		3605		11	2	2018	Zambia	Central		Namutoya	13.0014	S	30.1734	E	DM		WGS84		1545									FALSE		0				0	Brachycorythis buchananii
	Orchidaceae	Bulbophyllum	expallidum	J.J.Verm.					0	0	0		Bytebier, B.	Wightman, N.; Llarena, F.		3578		8	2	2018	Zambia	Northern		Kalungwishi Headwaters	9.55684	S	30.2075	E	DM		WGS84		1636									FALSE		0				0	Bulbophyllum expallidum
Herbarium sheet	Orchidaceae	Bulbophyllum	fuscum	Lindl.	var.	melinostachyum	(Schltr.) J.J.Verm.		0	0	0		Bytebier, B.	Wightman, N.; Llarena, F.		3577		8	2	2018	Zambia	Northern		Kalungwishi Headwaters	9.55684	S	30.2075	E	DM		WGS84		1636									FALSE		0				0	Bulbophyllum fuscum var. melinostachyum
Herbarium sheet	Orchidaceae	Centrostigma	clavatum	Summerh.					0	0	0		Bytebier, B.	Wightman, N.		3533		4	2	2018	Zambia	Central		Kundalila Falls	13.0923	S	30.4211	E	DM		WGS84		1494									FALSE		0				0	Centrostigma clavatum
Herbarium Sheet	Orchidaceae	Cynorkis	hanningtonii	Rolfe				Bytebier, B.	13	11	2017	checked	Bone, R.E.	Wightman, N.; Yokoya, K.; Mwaba, J.	RB	425		26	1	2017	Zambia	Muchinga	Shiwa	Kapishya	11.1006	S	31.3618	E	DMS		WGS84		1438		m		Y	n				FALSE		21			MAJOR/ GAZ/ New collector/ New addcoll/ New addcoll/ New addcoll/	0	Cynorkis hanningtonii
Herbarium sheet	Orchidaceae	Cynorkis	hanningtonii	Rolfe					0	0	0		Bytebier, B.	Wightman, N.; Llarena, F.		3606		11	2	2018	Zambia	Central		Namutoya	13.0014	S	30.1734	E	DM		WGS84		1545									FALSE		0				0	Cynorkis hanningtonii
Herbarium sheet	Orchidaceae	Cyrtorchis	praetermissa	Summerh.					0	0	0		Bytebier, B.	Wightman, N.; Llarena, F.		3576		8	2	2018	Zambia	Northern		Kalungwishi Headwaters	9.55684	S	30.2075	E	DM		WGS84		1636									FALSE		0				0	Cyrtorchis praetermissa
Herbarium Sheet	Orchidaceae	Disa	verdickii	De Wild.				Bytebier, B.	14	11	2017	checked	Bone, R.E.	Wightman, N.; Mpatwa, G.; Yokoya, K.	RB	402		20	1	2017	Zambia	North-Western	Mwinilunga	Lumwana	11.4845	S	25.0515	E	DMS		WGS84		1495		m		Y	n				FALSE		3			MAJOR/ GAZ/ New collector/ New addcoll/ New addcoll/ New addcoll/	0	Disa verdickii
Herbarium Sheet	Orchidaceae	Disa	welwitschii	Rchb.f.	subsp.	welwitschii		Bingham, M.; Bytebier, B.	14	11	2017	checked	Bone, R.E.	Wightman, N.; Mpatwa, G.; Yokoya, K.	RB	408		21	1	2017	Zambia	North-Western	Solwezi	Kangwena	12.2219	S	27.1822	E	DMS		WGS84		1313		m		Y	Y			Chikanda	FALSE		9			MAJOR/ GAZ/ New collector/ New addcoll/ New addcoll/ New addcoll/ New detby/	0	Disa welwitschii subsp. welwitschii
Herbarium Sheet	Orchidaceae	Disa	welwitschii	Rchb.f.	subsp.	welwitschii		Bytebier, B.	15	11	2017	checked	Bone, R.E.	Wightman, N.; Yokoya, K.	RB	420		25	1	2017	Zambia	Muchinga	Mpika	Mpepo	11.0838	S	31.1334	E	DMS		WGS84		1298		m		Y	n	Miala		Chikanda	FALSE		18			MAJOR/ GAZ/ New collector/ New addcoll/ New addcoll/	0	Disa welwitschii subsp. welwitschii
Herbarium Sheet	Orchidaceae	Disa	erubescens	Rendle	subsp.	carsonii	(N.E.Br.) H.P.Linder	Bytebier, B	14	11	2017	checked	Bone, R.E.	Wightman, N.; Yokoya, K.; Mwaba, J.	RB	428		26	1	2017	Zambia	Muchinga	Shiwa	Kapishya	11.101	S	31.3623	E	DMS		WGS84		1427		m		Y	n	Miala	Bemba	Chikanda	FALSE		24			MAJOR/ GAZ/ New collector/ New addcoll/ New addcoll/ New addcoll/	0	Disa erubescens subsp. carsonii
Herbarium Sheet	Orchidaceae	Disa	engleriana	Kraenzl.				Bytebier, B.	14	11	2017	checked	Bone, R.E.	Wightman, N.; Yokoya, K.	RB	432		26	1	2017	Zambia	Muchinga	Shiwa	Kapishya	11.1006	S	31.3617	E	DMS		WGS84		1430		m		Y	n	Miala	Bemba		FALSE		28			MAJOR/ GAZ/ New collector/ New addcoll/ New addcoll/	0	Disa engleriana
Herbarium Sheet	Orchidaceae	Disa	welwitschii	Rchb.f.	subsp.	welwitschii		Bytebier, B.	15	11	2017	checked	Bone, R.E.	Wightman, N.; Yokoya, K.; Kunda, V.	RB	441		28	1	2017	Zambia	Muchinga	Mpika	Mutinondo Wilderness Area	12.2619	S	31.1709	E	DMS		WGS84		1442		m		Y	n	Nsalu and Miala	Bemba		FALSE		37			MAJOR/ GAZ/ New collector/ New addcoll/ New addcoll/ New addcoll/	0	Disa welwitschii subsp. welwitschii
Herbarium sheet	Orchidaceae	Disa	hircicornis	Rchb.f.					0	0	0		Bytebier, B.	Wightman, N.		3535		4	2	2018	Zambia	Central		Kundalila Falls	13.0912	S	30.4219	E	DM		WGS84		1490									FALSE		0				0	Disa hircicornis
Herbarium sheet	Orchidaceae	Disa	aequiloba	Summerh.					0	0	0		Bytebier, B.	Wightman, N.		3545		5	2	2018	Zambia	Northern		Mutinondo Wilderness Area	12.2576	S	31.1623	E	DM		WGS84		1470									FALSE		0				0	Disa aequiloba
Herbarium sheet	Orchidaceae	Disa	aequiloba	Summerh.					0	0	0		Bytebier, B.	Wightman, N.; Llarena, F.		3551		6	2	2018	Zambia	Northern	Kasama	Luchindasi	10.2106	S	31.3167	E	DM		WGS84		1231									FALSE		0				0	Disa aequiloba
Herbarium sheet	Orchidaceae	Disa	engleriana	Kraenzl.					0	0	0		Bytebier, B.	Wightman, N.; Llarena, F.		3556		7	2	2018	Zambia	Northern	Kasama	Love N Light Lukupa	10.0806	S	31.0824	E	DM		WGS84		1294									FALSE		0				0	Disa engleriana
Herbarium sheet	Orchidaceae	Disa	aequiloba	Summerh.					0	0	0		Bytebier, B.	Wightman, N.; Llarena, F.		3560		7	2	2018	Zambia	Northern	Kasama	Ilunda Dambo	10.066	S	31.1021	E	DM		WGS84		1322									FALSE		0				0	Disa aequiloba
Herbarium sheet	Orchidaceae	Disa	aequiloba	Summerh.					0	0	0		Bytebier, B.	Wightman, N.; Llarena, F.		3569		8	2	2018	Zambia	Northern	Kasama		10.1086	S	30.577	E	DM		WGS84		1233									FALSE		0				0	Disa aequiloba
Herbarium sheet	Orchidaceae	Disa	engleriana	Kraenzl.					0	0	0		Bytebier, B.	Wightman, N.; Llarena, F.		3573		8	2	2018	Zambia	Northern		Kalungwishi Headwaters	9.55684	S	30.2075	E	DM		WGS84		1636									FALSE		0				0	Disa engleriana
Herbarium sheet	Orchidaceae	Disa	erubescens	Rendle	subsp.	carsonii	(N.E.Br.) H.P.Linder		0	0	0		Bytebier, B.	Wightman, N.; Llarena, F.		3574		8	2	2018	Zambia	Northern		Kalungwishi Headwaters	9.55684	S	30.2075	E	DM		WGS84		1636									FALSE		0				0	Disa erubescens subsp. carsonii
Herbarium sheet	Orchidaceae	Disa	equestris	Rchb.f.					0	0	0		Bytebier, B.	Wightman, N.; Llarena, F.		3575		8	2	2018	Zambia	Northern		Kalungwishi Headwaters	9.55684	S	30.2075	E	DM		WGS84		1636									FALSE		0				0	Disa equestris
Herbarium sheet	Orchidaceae	Disa	welwitschii	Rchb.f.	subsp.	welwitschii			0	0	0		Bytebier, B.	Wightman, N.; Llarena, F.; Chipalo, F.		3585		9	2	2018	Zambia	Luapula		Koshima Dambo	9.58087	S	29.5346	E	DM		WGS84		1460									FALSE		0				0	Disa welwitschii subsp. welwitschii
Herbarium sheet	Orchidaceae	Disa	aequiloba	Summerh.					0	0	0		Bytebier, B.	Wightman, N.; Llarena, F.		3594		10	2	2018	Zambia	Luapula			11.1638	S	29.0892	E	DM		WGS84		1229									FALSE		0				0	Disa aequiloba
Herbarium sheet	Orchidaceae	Disa							0	0	0		Bytebier, B.	Wightman, N.; Llarena, F.		3596		10	2	2018	Zambia	Luapula			11.1638	S	29.0892	E	DM		WGS84		1229									FALSE		0				0	Disa
Herbarium sheet	Orchidaceae	Disa	welwitschii	Rchb.f.	subsp.	welwitschii			0	0	0		Bytebier, B.	Wightman, N.; Llarena, F.		3599		11	2	2018	Zambia	Luapula		Bangweulu Wetlands	12.0198	S	29.3751	E	DM		WGS84		1171									FALSE		0				0	Disa welwitschii subsp. welwitschii
Herbarium Sheet	Orchidaceae	Disperis	katangensis	Summerh.				Bytebier, B	13	11	2017	checked	Bone, R.E.	Wightman, N.; Yokoya, K.; Mwaba, J.	RB	424		26	1	2017	Zambia	Muchinga	Shiwa	Kapishya	11.1006	S	31.3617	E	DMS		WGS84		1438		m		Y	n				FALSE		20			MAJOR/ GAZ/ New collector/ New addcoll/ New addcoll/ New addcoll/	0	Disperis katangensis
Herbarium sheet	Orchidaceae	Disperis	katangensis	Summerh.					0	0	0		Bytebier, B.	Wightman, N.		3542		5	2	2018	Zambia	Northern		Mutinondo Wilderness Area	12.2681	S	31.1721	E	DM		WGS84		1470									FALSE		0				0	Disperis katangensis
Herbarium sheet	Orchidaceae	Disperis	breviloba	Verdc.					0	0	0		Bytebier, B.	Wightman, N.; Llarena, F.		3597		11	2	2018	Zambia	Luapula		Bangweulu Wetlands	12.0198	S	29.3751	E	DM		WGS84		1171									FALSE		0				0	Disperis breviloba
Herbarium sheet	Orchidaceae	Eulophia	hians	Spreng.	var.	nutans	(Sond.) S.Thomas		0	0	0		Bytebier, B.	Wightman, N.		3538		4	2	2018	Zambia	Central		Kundalila Falls	13.0912	S	30.4219	E	DM		WGS84		1490									FALSE		0				0	Eulophia hians var. nutans
Herbarium sheet	Orchidaceae	Eulophia	latilabris	Summerh.					0	0	0		Bytebier, B.	Wightman, N.; Llarena, F.		3547		6	2	2018	Zambia	Northern	Kasama	Munguri	10.018	S	31.3707	E	DM		WGS84		1217									FALSE		0				0	Eulophia latilabris
Herbarium sheet	Orchidaceae	Eulophia	malangana	(Rchb.f.) Summerh.					0	0	0		Bytebier, B.	Wightman, N.; Llarena, F.		3548		6	2	2018	Zambia	Northern	Kasama	Munguri	10.018	S	31.3707	E	DM		WGS84		1217									FALSE		0				0	Eulophia malangana
Herbarium sheet	Orchidaceae	Eulophia							0	0	0		Bytebier, B.	Wightman, N.; Llarena, F.		3549		6	2	2018	Zambia	Northern	Kasama	Munguri	10.018	S	31.3707	E	DM		WGS84		1217									FALSE		0				0	Eulophia
Herbarium sheet	Orchidaceae	Eulophia	malangana	(Rchb.f.) Summerh.					0	0	0		Bytebier, B.	Wightman, N.; Llarena, F.		3555		6	2	2018	Zambia	Northern	Kasama	Luchindasi	10.2101	S	31.3166	E	DM		WGS84		1243									FALSE		0				0	Eulophia malangana
Herbarium sheet	Orchidaceae	Eulophia							0	0	0		Bytebier, B.	Wightman, N.; Llarena, F.		3561		7	2	2018	Zambia	Northern	Kasama	Ilunda Dambo	10.0645	S	31.1019	E	DM		WGS84		1333									FALSE		0				0	Eulophia
Herbarium sheet	Orchidaceae	Eulophia							0	0	0		Bytebier, B.	Wightman, N.; Llarena, F.		3562		7	2	2018	Zambia	Northern	Kasama	Ilunda Dambo	10.0645	S	31.1019	E	DM		WGS84		1333									FALSE		0				0	Eulophia
Herbarium sheet	Orchidaceae	Eulophia	angolensis	(Rchb.f.) Summerh.					0	0	0		Bytebier, B.	Wightman, N.; Llarena, F.		3565		8	2	2018	Zambia	Northern	Kasama		10.1086	S	30.577	E	DM		WGS84		1233									FALSE		0				0	Eulophia angolensis
Herbarium sheet	Orchidaceae	Eulophia							0	0	0		Bytebier, B.	Wightman, N.; Llarena, F.		3571		8	2	2018	Zambia	Northern	Kasama		10.1086	S	31.577	E	DM		WGS84		1233									FALSE		0				0	Eulophia
Herbarium sheet	Orchidaceae	Eulophia							0	0	0		Bytebier, B.	Wightman, N.; Llarena, F.		3572		8	2	2018	Zambia	Northern	Kasama		10.1086	S	31.577	E	DM		WGS84		1233									FALSE		0				0	Eulophia
Herbarium sheet	Orchidaceae	Eulophia							0	0	0		Bytebier, B.	Wightman, N.; Llarena, F.; Chipalo, F.		3579		9	2	2018	Zambia	Northern	Luwingu	Samda Farm	10.0929	S	29.5632	E	DM		WGS84		1402									FALSE		0				0	Eulophia
	Orchidaceae	Habenaria	villosa	Rolfe				Bytebier, B.	0	0	0		du Plessis, S.	du Plessis, D.				0	0	0	Zambia	Central	Mkushi	Chengelo	13.4242	S	29.3083	E	DM													FALSE		0				0	Habenaria villosa
	Orchidaceae	Habenaria							0	0	0		Bytebier, B.	Wightman, N.; Llarena, F.		3570		8	2	2018	Zambia	Northern	Kasama		10.1086	S	30.577	E	DM		WGS84		1233									FALSE		0				0	Habenaria
Herbarium Sheet	Orchidaceae	Habenaria	goetzeana	Kraenzl.				Bytebier, B.	16	11	2017	checked	Bone, R.E.	Wightman, N.; Yokoya, K.; Hostetter, J.	RB	418		24	1	2017	Zambia	Northern	Kasama	Kasama	10.0757	S	31.0821	E	DMS		WGS84		1295		m		Y	n				FALSE		16			MAJOR/ GAZ/ New collector/ New addcoll/ New addcoll/ New addcoll/	0	Habenaria goetzeana
Herbarium Sheet	Orchidaceae	Habenaria	holubii	Rolfe				Bytebier, B	16	11	2017	checked	Bone, R.E.	Wightman, N.; Yokoya, K.; Llarena, F.	RB	419		24	1	2017	Zambia	Northern	Kasama	Kasama	10.0753	S	31.0319	E	DMS		WGS84		1291		m		Y	n				FALSE		17			MAJOR/ GAZ/ New collector/ New addcoll/ New addcoll/ New addcoll/	0	Habenaria holubii
Herbarium Sheet	Orchidaceae	Habenaria	cataphysema	Rchb.f.				Bytebier, B.	6	12	2017	checked	Bone, R.E.	Wightman, N.; Yokoya, K.	RB	434		27	1	2017	Zambia	Muchinga	Shiwa	Shiwa Ngandu	11.1109	S	31.4721	E	DMS		WGS84		1469		m		Y	n			Not thought to be used for Chikanda	FALSE		30			MAJOR/ GAZ/ New collector/ New addcoll/ New addcoll/	0	Habenaria cataphysema
Herbarium Sheet	Orchidaceae	Habenaria	schimperiana	Hochst. ex A.Rich.				Bytebier, B	6	12	2017	checked	Bone, R.E.	Wightman, N.; Yokoya, K.	RB	435		27	1	2017	Zambia	Muchinga	Shiwa	Shiwa Ngandu	11.1109	S	31.4721	E	DMS		WGS84		1469		m		Y	n				FALSE		31			MAJOR/ GAZ/ New collector/ New addcoll/ New addcoll/	0	Habenaria schimperiana
Herbarium Sheet	Orchidaceae	Habenaria	argentea	P.J.Cribb				Bytebier, B.	6	12	2017	checked	Bone, R.E.	Wightman, N.; Yokoya, K.	RB	436		27	1	2017	Zambia	Muchinga	Shiwa	Shiwa Ngandu	11.1109	S	31.4721	E	DMS		WGS84		1469		m		Y	n				FALSE		32			MAJOR/ GAZ/ New collector/ New addcoll/ New addcoll/	0	Habenaria argentea
Herbarium Sheet	Orchidaceae	Habenaria	filicornis	Lindl.				Bytebier, B.	6	12	2107	checked	Bone, R.E.	Wightman, N.; Yokoya, K.	RB	439		27	1	2017	Zambia	Muchinga	Shiwa	Shiwa Ngandu	11.1109	S	31.4721	E	DMS		WGS84		1469		m		Y	n				FALSE		35			MAJOR/ GAZ/ New collector/ New addcoll/ New addcoll/	0	Habenaria filicornis
Herbarium Sheet	Orchidaceae	Habenaria	macroplectron	Schltr.				Bytebier, B	5	12	2017	checked	Bone, R.E.	Wightman, N.; Yokoya, K.	RB	440		27	1	2017	Zambia	Muchinga	Shiwa	Shiwa Ngandu	11.1109	S	31.4721	E	DMS		WGS84		1469		m		Y	n				FALSE		36			MAJOR/ GAZ/ New collector/ New addcoll/ New addcoll/	0	Habenaria macroplectron
Herbarium Sheet	Orchidaceae	Habenaria	laurentii	De Wild.				Bytebier, B.	8	12	2017	checked	Bone, R.E.	Wightman, N.; Yokoya, K.; Kunda, V.	RB	444		28	1	2017	Zambia	Muchinga	Mpika	Mutinondo Wilderness Area	12.2542	S	31.1718	E	DMS		WGS84		1462		m		Y					FALSE		40			MAJOR/ GAZ/ New collector/ New addcoll/ New addcoll/ New addcoll/	0	Habenaria laurentii
Herbarium sheet	Orchidaceae	Habenaria	debeerstiana	Kraenzl.				Bytebier, B.	5	12	2017	checked	Bone, R.E.	Wightman, N.; Yokoya, K.; Kunda, V.	RB	448		29	1	2017	Zambia	Muchinga	Mpika	Mutinondo Wilderness Area	12.2508	S	31.1212	E	DMS		WGS84		1493		m		Y	n				FALSE		44			MAJOR/ GAZ/ New collector/ New addcoll/ New addcoll/ New addcoll/	0	Habenaria debeerstiana
Herbarium sheet	Orchidaceae	Habenaria	villosa	Rolfe				Bytebier, B.	0	0	0		Bytebier, B.	Wightman, N.; du Plessis, S.; du Plessis, D.		3532		4	2	2018	Zambia	Central	Mkushi	Chengelo	13.4219	S	29.3285	E	DM		WGS84		1365									FALSE		0				0	Habenaria villosa
Herbarium sheet	Orchidaceae	Habenaria	macroplectron	Schltr.					0	0	0		Bytebier, B.	Wightman, N.		3534		4	2	2018	Zambia	Central		Kundalila Falls	13.0923	S	30.4211	E	DM		WGS84		1494									FALSE		0				0	Habenaria macroplectron
Herbarium sheet	Orchidaceae	Habenaria	humilior	Rchb.f.					0	0	0		Bytebier, B.	Wightman, N.		3537		4	2	2018	Zambia	Central		Kundalila Falls	13.0912	S	30.4219	E	DM		WGS84		1490									FALSE		0				0	Habenaria humilior
Herbarium sheet	Orchidaceae	Habenaria							0	0	0		Bytebier, B.	Wightman, N.		3541		5	2	2018	Zambia	Northern		Mutinondo Wilderness Area	12.2681	S	31.1721	E	DM		WGS84		1470									FALSE		0				0	Habenaria
Herbarium sheet	Orchidaceae	Habenaria							0	0	0		Bytebier, B.	Wightman, N.		3546		5	2	2018	Zambia	Northern		Mutinondo Wilderness Area	12.2576	S	31.1623	E	DM		WGS84		1470									FALSE		0				0	Habenaria
Herbarium sheet	Orchidaceae	Habenaria							0	0	0		Bytebier, B.	Wightman, N.; Llarena, F.		3552		6	2	2018	Zambia	Northern	Kasama	Luchindasi	10.2116	S	31.316	E	DM		WGS84		1230									FALSE		0				0	Habenaria
Herbarium sheet	Orchidaceae	Habenaria	goetzeana	Kraenzl.					0	0	0		Bytebier, B.	Wightman, N.; Llarena, F.		3557		7	2	2018	Zambia	Northern	Kasama	Love N Light Lukupa	10.0795	S	31.0834	E	DM		WGS84		1296									FALSE		0				0	Habenaria goetzeana
Herbarium sheet	Orchidaceae	Habenaria							0	0	0		Bytebier, B.	Wightman, N.; Llarena, F.		3563		7	2	2018	Zambia	Northern	Kasama	Ilunda Dambo	10.0639	S	31.1011	E	DM		WGS84		1341									FALSE		0				0	Habenaria
Herbarium sheet	Orchidaceae	Habenaria							0	0	0		Bytebier, B.	Wightman, N.; Llarena, F.		3564		8	2	2018	Zambia	Northern	Kasama		10.1086	S	30.577	E	DM		WGS84		1233									FALSE		0				0	Habenaria
Herbarium sheet	Orchidaceae	Habenaria	holubii	Rolfe					0	0	0		Bytebier, B.	Wightman, N.; Llarena, F.		3566		8	2	2018	Zambia	Northern	Kasama		10.1086	S	30.577	E	DM		WGS84		1233									FALSE		0				0	Habenaria holubii
Herbarium sheet	Orchidaceae	Habenaria							0	0	0		Bytebier, B.	Wightman, N.; Llarena, F.		3567		8	2	2018	Zambia	Northern	Kasama		10.1086	S	30.577	E	DM		WGS84		1233									FALSE		0				0	Habenaria
Herbarium sheet	Orchidaceae	Habenaria							0	0	0		Bytebier, B.	Wightman, N.; Llarena, F.		3568		8	2	2018	Zambia	Northern	Kasama		10.1086	S	30.577	E	DM		WGS84		1233									FALSE		0				0	Habenaria
Herbarium sheet	Orchidaceae	Habenaria							0	0	0		Bytebier, B.	Wightman, N.; Llarena, F.; Chipalo, F.		3582		9	2	2018	Zambia	Luapula		Koshima Dambo	9.58291	S	29.5381	E	DM		WGS84		1446									FALSE		0				0	Habenaria
Herbarium sheet	Orchidaceae	Habenaria	macroplectron	Schltr.					0	0	0		Bytebier, B.	Wightman, N.; Llarena, F.; Chipalo, F.		3584		9	2	2018	Zambia	Luapula		Koshima Dambo	9.58087	S	29.5346	E	DM		WGS84		1460									FALSE		0				0	Habenaria macroplectron
Herbarium sheet	Orchidaceae	Habenaria	cornuta	Lindl.					0	0	0		Bytebier, B.	Wightman, N.; Llarena, F.		3592		10	2	2018	Zambia	Luapula			11.1638	S	29.0892	E	DM		WGS84		1229									FALSE		0				0	Habenaria cornuta
Herbarium sheet	Orchidaceae	Habenaria	filicornis	Lindl.					0	0	0		Bytebier, B.	Wightman, N.; Llarena, F.		3593		10	2	2018	Zambia	Luapula			11.1638	S	29.0892	E	DM		WGS84		1229									FALSE		0				0	Habenaria filicornis
Herbarium sheet	Orchidaceae	Habenaria							0	0	0		Bytebier, B.	Wightman, N.; Llarena, F.		3601		11	2	2018	Zambia	Luapula		Bangweulu Wetlands	12.0207	S	29.3739	E	DM		WGS84		1178									FALSE		0				0	Habenaria
Herbarium sheet	Orchidaceae	Habenaria							0	0	0		Bytebier, B.	Wightman, N.		3607		12	2	2018	Zambia	Central		Mkushi	13.4125	S	29.3347	E	DM		WGS84		1462									FALSE		0				0	Habenaria
Herbarium sheet	Orchidaceae	Habenaria							0	0	0		Bytebier, B.	Wightman, N.		3608		12	2	2018	Zambia	Central		Mkushi	13.4125	S	29.3347	E	DM		WGS84		1462									FALSE		0				0	Habenaria
Herbarium sheet	Orchidaceae	Liparis							0	0	0		Bytebier, B.	Wightman, N.		3539		4	2	2018	Zambia	Central		Kundalila Falls	13.0912	S	30.4219	E	DM		WGS84		1490									FALSE		0				0	Liparis
Herbarium sheet	Orchidaceae	Liparis							0	0	0		Bytebier, B.	Wightman, N.; Llarena, F.		3550		6	2	2018	Zambia	Northern	Kasama	Luchindasi	10.2101	S	31.3182	E	DM		WGS84		1228									FALSE		0				0	Liparis
Herbarium sheet	Orchidaceae	Nervilia							0	0	0		Bytebier, B.	Wightman, N.; Llarena, F.; Chipalo, F.		3581		9	2	2018	Zambia	Northern	Luwingu	Samda Farm	10.0931	S	29.5619	E	DM		WGS84		1405									FALSE		0				0	Nervilia
Herbarium sheet	Orchidaceae	Nervilia	adolphi	Schltr.					0	0	0		Bytebier, B.	Wightman, N.; Llarena, F.		3602		11	2	2018	Zambia	Central		Namutoya	12.4148	S	30.2399	E	DM		WGS84		1327									FALSE		0				0	Nervilia adolphi
Herbarium sheet	Orchidaceae	Orthochilus	ensatus	(Lindl.) Bytebier					0	0	0		Bytebier, B.	Wightman, N.; Llarena, F.		3600		11	2	2018	Zambia	Luapula		Bangweulu Wetlands	12.0207	S	29.3739	E	DM		WGS84		1178									FALSE		0				0	Orthochilus ensatus
Herbarium Sheet	Orchidaceae	Platycoryne	buchananiana	(Kraenzl.) Rolfe				Bytebier, B	11	12	2017	checked	Bone, R.E.	Wightman, N.; Yokoya, K.; Hostetter, J.	RB	417		24	1	2017	Zambia	Northern	Kasama	Kasama	10.0758	S	31.082	E	DMS		WGS84		1299		m		Y	n			Not used for Chikanda	FALSE		15			MAJOR/ GAZ/ New collector/ New addcoll/ New addcoll/ New addcoll/	0	Platycoryne buchananiana
Herbarium Sheet	Orchidaceae	Platycoryne	macroceras	Summerh.				Bytebier, B	11	12	2017	checked	Bone, R.E.	Wightman, N.; Yokoya, K.; Mwaba, J.	RB	427		26	1	2017	Zambia	Muchinga	Shiwa	Kapishya	11.101	S	31.3623	E	DMS		WGS84		1427		m		Y	Y				FALSE		23			MAJOR/ GAZ/ New collector/ New addcoll/ New addcoll/ New addcoll/	0	Platycoryne macroceras
Herbarium Sheet	Orchidaceae	Platycoryne	isoetifolia	P.J.Cribb				Bytebier, B.; Croix, I.F. la	7	12	2017	checked	Bone, R.E.	Wightman, N.; Yokoya, K.; Mwaba, J.	RB	429		26	1	2017	Zambia	Muchinga	Shiwa	Kapishya	11.101	S	31.3623	E	DMS		WGS84		1427		m		Y	n			Not thought to be used for Chikanda	FALSE		25			MAJOR/ GAZ/ New collector/ New addcoll/ New addcoll/ New addcoll/	0	Platycoryne isoetifolia
Herbarium sheet	Orchidaceae	Platycoryne	mediocris	Summerh.					0	0	0		Bytebier, B.	Wightman, N.		3540		5	2	2018	Zambia	Northern		Mutinondo Wilderness Area	12.2728	S	31.1751	E	DM		WGS84		1450									FALSE		0				0	Platycoryne mediocris
Herbarium sheet	Orchidaceae	Platycoryne	buchananiana	(Kraenzl.) Rolfe					0	0	0		Bytebier, B.	Wightman, N.; Llarena, F.		3558		7	2	2018	Zambia	Northern	Kasama	Love N Light Lukupa	10.0795	S	31.0834	E	DM		WGS84		1296									FALSE		0				0	Platycoryne buchananiana
Herbarium Sheet	Orchidaceae	Satyrium	kitimboÎnse	Kraenzl.				Bytebier, B.	11	12	2017	checked	Bone, R.E.	Wightman, N.; Mpatwa, G.; Yokoya, K.	RB	400		20	1	2017	Zambia	North-Western	Mwinilunga	Chimwishi	11.4303	S	24.3425	E	DMS		WGS84		1443		m		Y	N	Chikanda			FALSE		1			MAJOR/ GAZ/ New collector/ New addcoll/ New addcoll/ New addcoll/	0	Satyrium kitimboÎnse
Herbarium Sheet	Orchidaceae	Satyrium	kitimboÎnse	Kraenzl.				Bytebier, B.	11	12	2017	checked	Bone, R.E.	Wightman, N.; Mpatwa, G.; Yokoya, K.	RB	401		20	1	2017	Zambia	North-Western	Mwinilunga	Chimwishi	11.4303	S	24.3425	E	DMS		WGS84		1443		m		Y	n	Chikanda			FALSE		2			MAJOR/ GAZ/ New collector/ New addcoll/ New addcoll/ New addcoll/	0	Satyrium kitimboÎnse
Herbarium Sheet	Orchidaceae	Satyrium	kitimboÎnse	Kraenzl.				Bytebier, B	11	12	2017	checked	Bone, R.E.	Wightman, N.; Mpatwa, G.; Yokoya, K.	RB	406		20	1	2017	Zambia	North-Western	Solwezi	Kalumbila	12.1029	S	25.3243	E	DMS		WGS84				m		Y	n				FALSE		7			New species (sp2/3)/ New species (sp2/3)/ MAJOR/ GAZ/ New collector/ New addcoll/ New addcoll/ New addcoll/	0	Satyrium kitimboÎnse
Herbarium Sheet	Orchidaceae	Satyrium	trinerve	Lindl.				Bytebier, B.; Niet, T. van der	30	1	2018	checked	Bone, R.E.	Wightman, N.; Yokoya, K.	RB	412		23	1	2017	Zambia	Central	Serenje	Chiwolea	13.0854	S	30.214	E	DMS		WGS84						n	Y			Chikanda	FALSE		11			MAJOR/ GAZ/ New collector/ New addcoll/ New addcoll/	0	Satyrium trinerve
Herbarium Sheet	Orchidaceae	Satyrium	trinerve	Lindl.				Bytebier, B.	11	12	2017	checked	Bone, R.E.	Wightman, N.; Yokoya, K.; Hostetter, J.; Bama-Ruben	RB	415		24	1	2017	Zambia	Northern	Kasama	Kasama	10.0803	S	31.0754	E	DMS		WGS84		1287		m		n	Y	Chikanda		Chikanda	FALSE		13			MAJOR/ GAZ/ New collector/ New addcoll/ New addcoll/ New addcoll/ New addcoll/	0	Satyrium trinerve
Herbarium Sheet	Orchidaceae	Satyrium	carsonii	Rolfe				Bytebier, B.	11	12	2107	checked	Bone, R.E.	Wightman, N.; Yokoya, K.; Hostetter, J.; Bama-Ruben	RB	416		24	1	2017	Zambia	Northern	Kasama	Kasama	10.0805	S	31.0819	E	DMS		WGS84		1306		m		Y	n				FALSE		14			MAJOR/ GAZ/ New collector/ New addcoll/ New addcoll/ New addcoll/ New addcoll/	0	Satyrium carsonii
Herbarium Sheet	Orchidaceae	Satyrium	buchananii	Schltr.				Bytebier, B	11	12	2017	checked	Bone, R.E.	Wightman, N.; Yokoya, K.; Kunda, V.	RB	442		28	1	2017	Zambia	Muchinga	Mpika	Mutinondo Wilderness Area	12.2621	S	31.1709	E	DMS		WGS84		1443		m		Y	Y				FALSE		38			New species (sp2/3)/ New species (sp2/3)/ MAJOR/ GAZ/ New collector/ New addcoll/ New addcoll/ New addcoll/	0	Satyrium buchananii
Herbarium Sheet	Orchidaceae	Satyrium	trinerve	Lindl.				Bytebier, B	11	12	2017	checked	Bone, R.E.	Wightman, N.; Yokoya, K.; Kunda, V.	RB	445		28	1	2017	Zambia	Muchinga	Mpika	Mutinondo Wilderness Area	12.2505	S	31.1729	E	DMS		WGS84		1449		m		Y	Y			Popular Chikanda species	FALSE		41			MAJOR/ GAZ/ New collector/ New addcoll/ New addcoll/ New addcoll/	0	Satyrium trinerve
Herbarium sheet	Orchidaceae	Satyrium	kitimboÎnse	Kraenzl.					0	0	0		Bytebier, B.	Wightman, N.		3543		5	2	2018	Zambia	Northern		Mutinondo Wilderness Area	12.2681	S	31.1721	E	DM		WGS84		1470									FALSE		0				0	Satyrium kitimboÎnse
Herbarium sheet	Orchidaceae	Satyrium							0	0	0		Bytebier, B.	Wightman, N.; Llarena, F.; Chipalo, F.		3587		9	2	2018	Zambia	Luapula		Koshima Dambo	9.58005	S	29.5343	E	DM		WGS84		1468									FALSE		0				0	Satyrium
[truncated: 29 more columns]
