# Supplementary figures and images for: Trade in Zambian Edible Orchids &ndash; DNA Barcoding Reveals Use of Unexpected Orchid Taxa for <em>Chikanda</em>
Source: Preprints.org preprint supplement (doi:10.20944/preprints201810.0587.v1), 2018-10-25

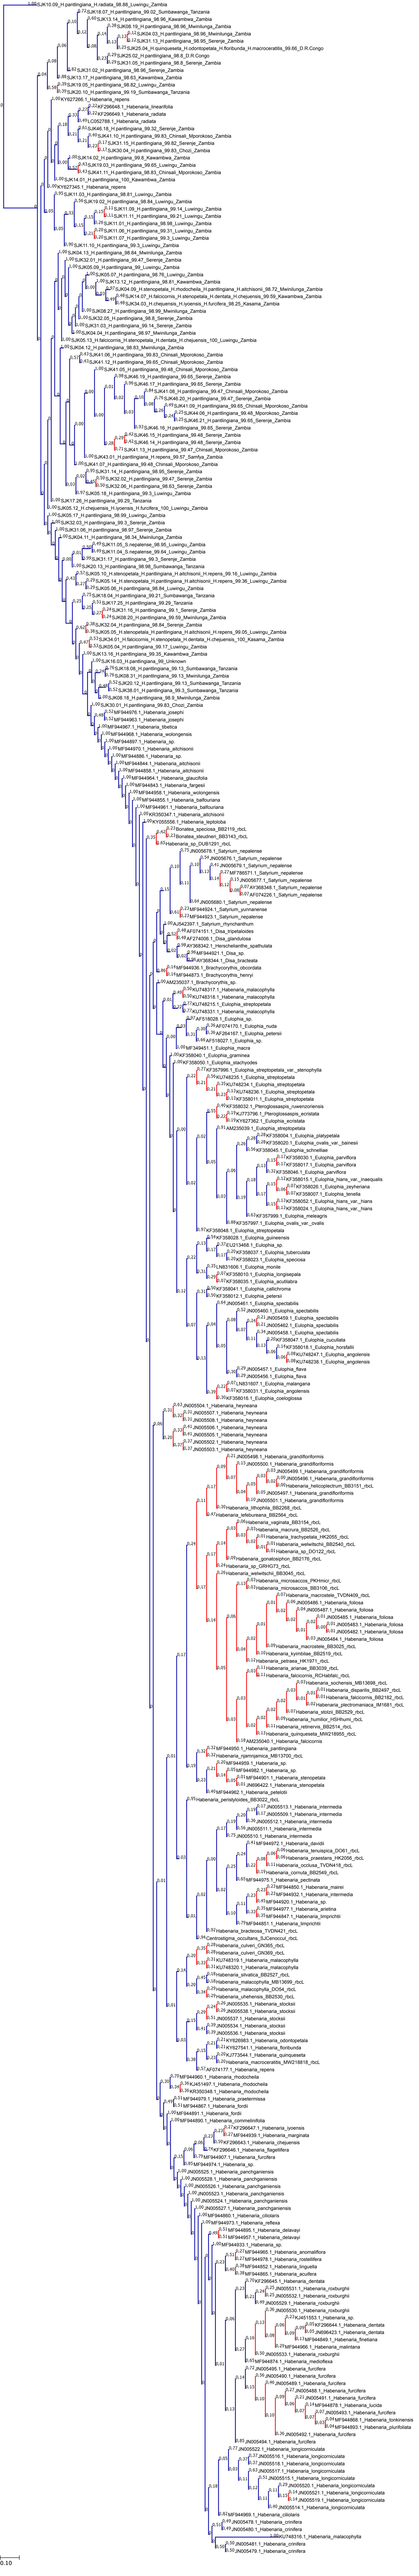

Supplement: Supplementary file 3 [file supplementary]
